# Supplementary material for: Catalytically active nanosized Pd9Te4(telluropalladinite) and PdTe (kotulskite) alloys: first precursor-architecture controlled synthesis using palladium complexes of organotellurium compounds as single source precursors
Source: Royal Society of Chemistry journal article supplement (doi:10.1039/d0ra08732g), 2021-01-01
Supplement: d0ra08732g1.pdf [file d0ra08732g1.pdf]

**Electronic Supplementary Information**

for

**Catalytically Active Nanosized Pd<sub>9</sub>Te<sub>4</sub> (Telluropalladinite) and Pdte (Kotulskite)**

**Alloys: First Precursor-Architecture Controlled Synthesis using Organotellurium**

**Compounds as Single Source Precursors**

Aayushi Arora,<sup>a</sup> Preeti Oswal,<sup>a</sup> Gyandshwar K. Rao,<sup>b</sup> Sushil Kumar,<sup>a</sup> Ajai K. Singh,<sup>c</sup> Arun  
Kumar\*<sup>a</sup>

<sup>a</sup>Department of Chemistry, School of Physical Sciences, Doon University, Dehradun,  
Uttarakhand, 248012 (India)

<sup>b</sup>Department of Chemistry, Amity School of Applied Sciences, Amity University Haryana  
(AUH), Gurgaon, Haryana, 122413 (India)

<sup>c</sup>Department of Chemistry, Indian Institute of Technology Delhi, New Delhi, 110016 (India)

## Section 1. NMR and HRMS Spectra

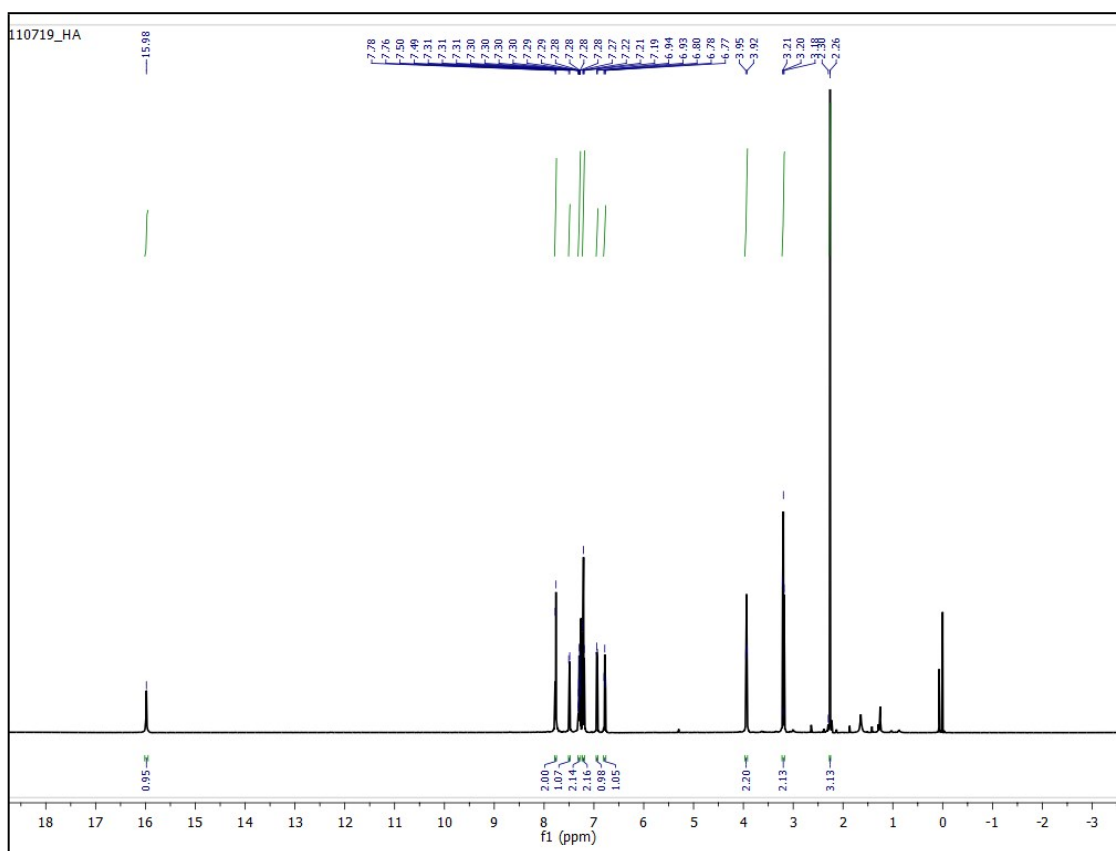

Figure S1.  $^1\text{H}$  NMR of L2

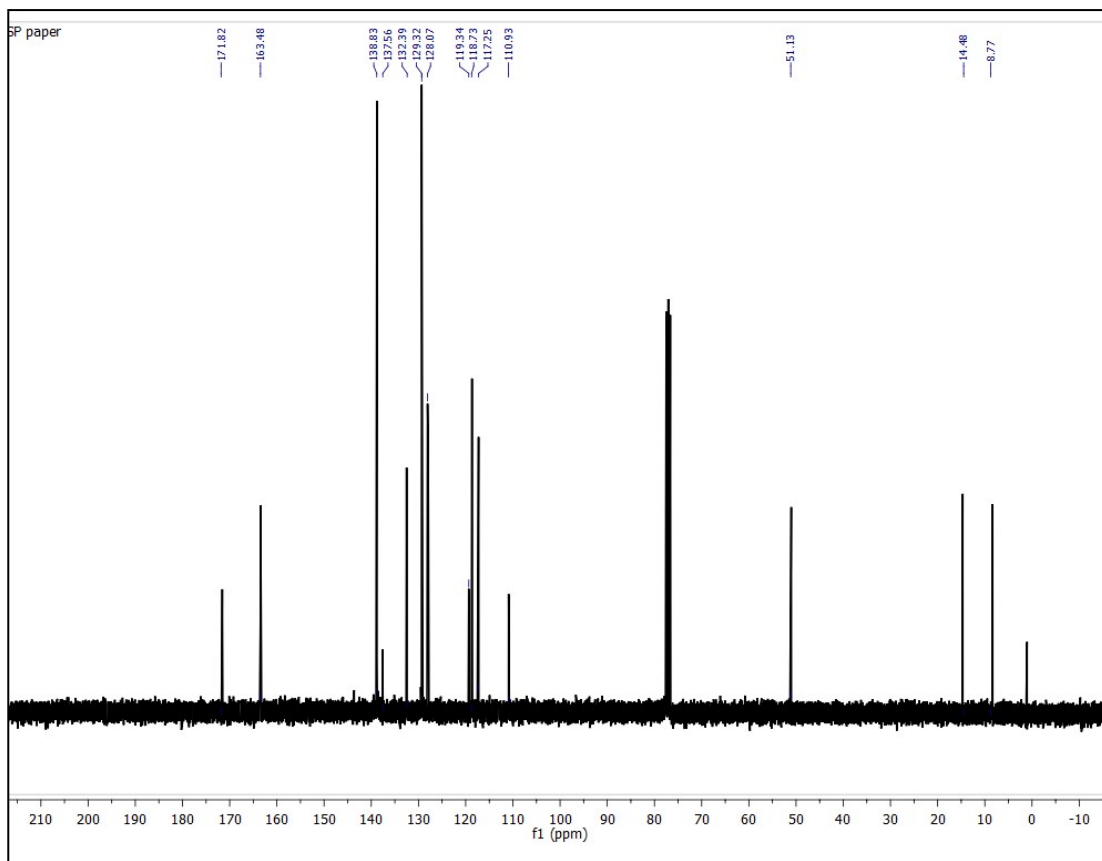

Figure S2.  $^{13}\text{C}$  NMR of **L2**

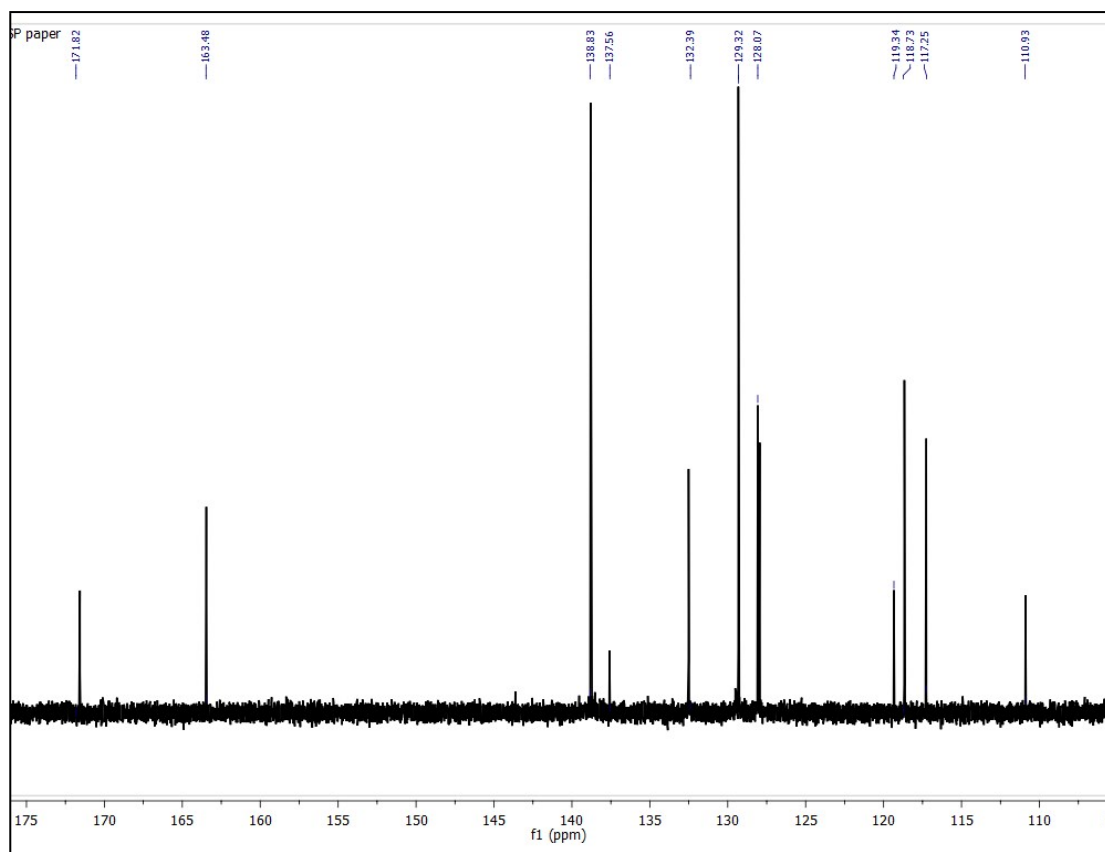

Figure S3. Magnified view of  $^{13}\text{C}$  NMR of L2

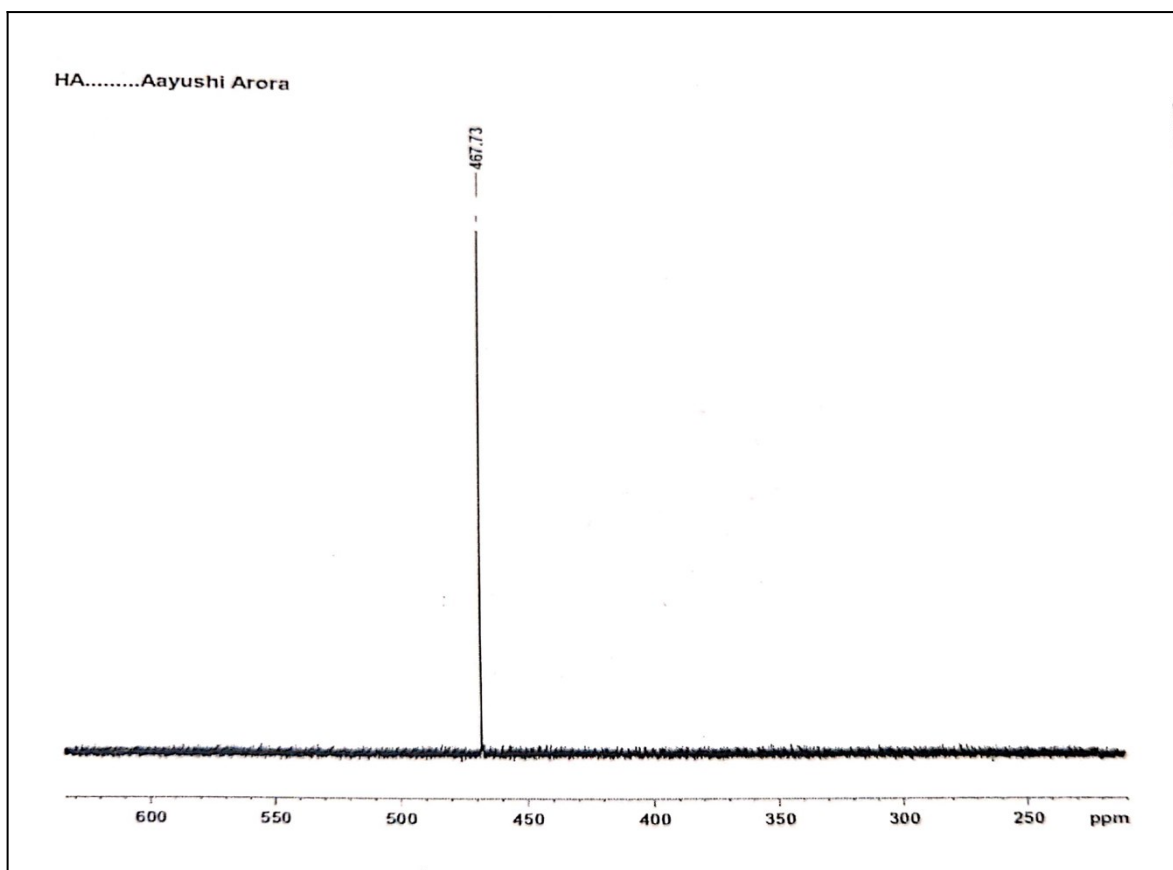

Figure S4.  $^{125}\text{Te}$  NMR of L2

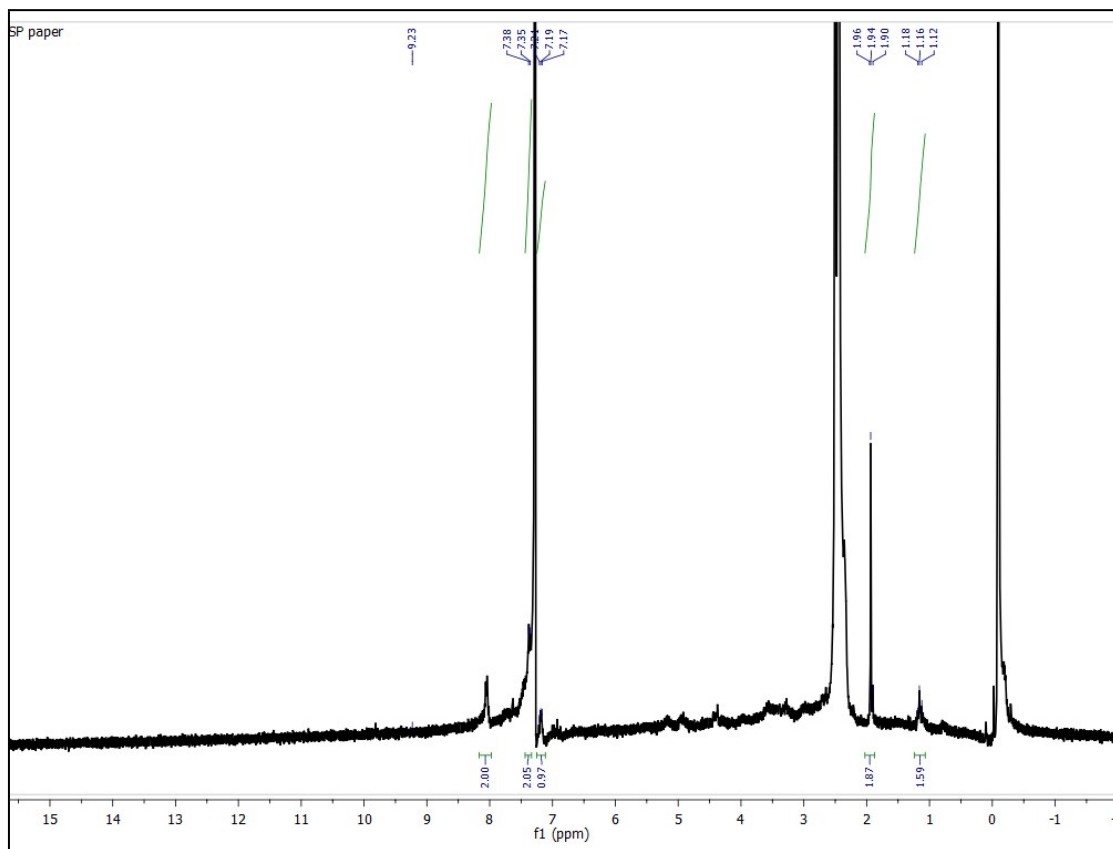

Figure S5.  $^1\text{H}$  NMR of **1**

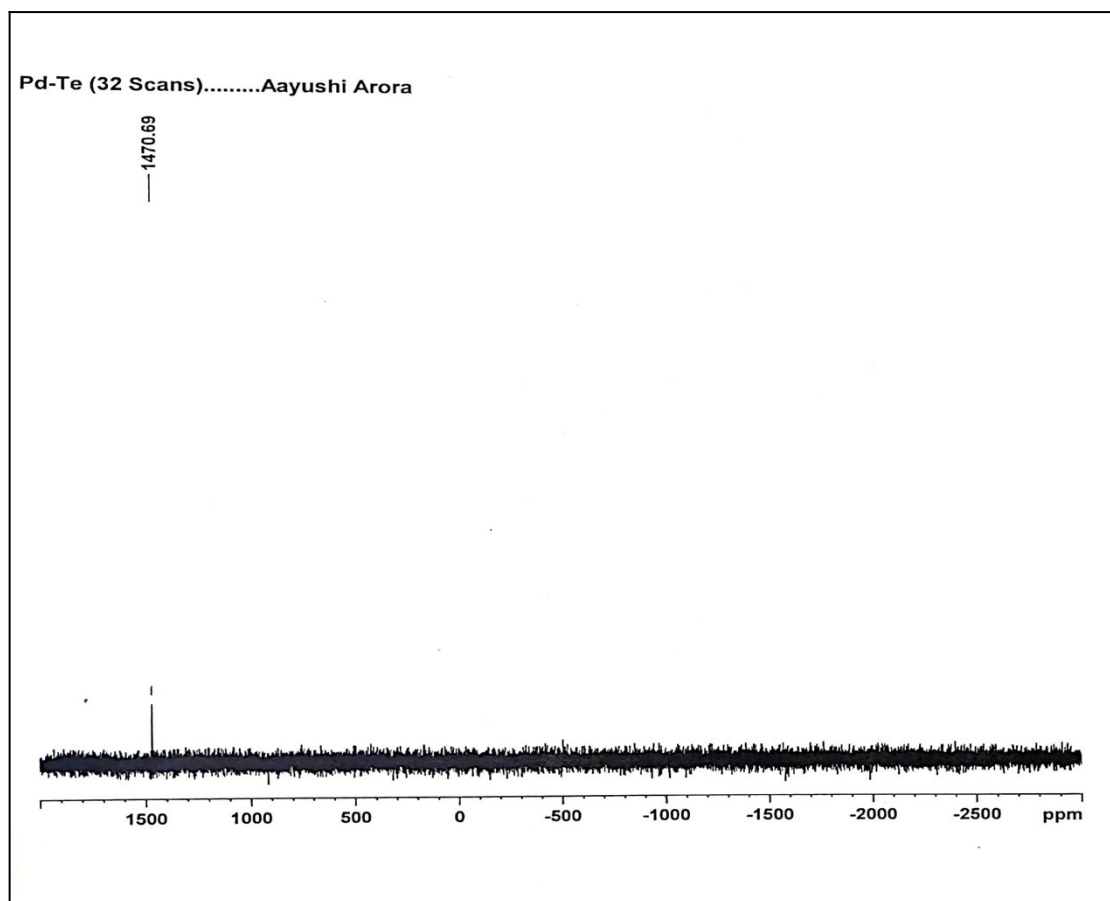

Figure S6.  $^{125}\text{Te}$  NMR of **1**

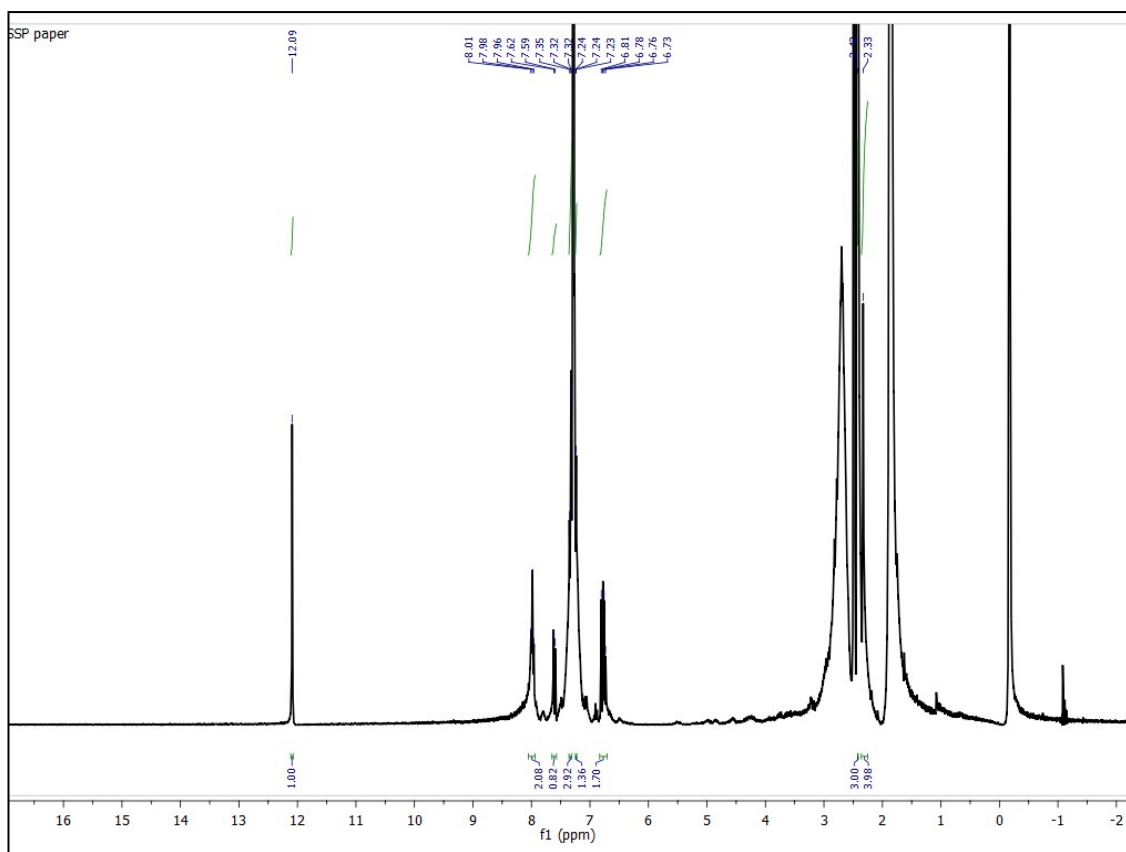

Figure S7.  $^1\text{H}$  NMR of **2**



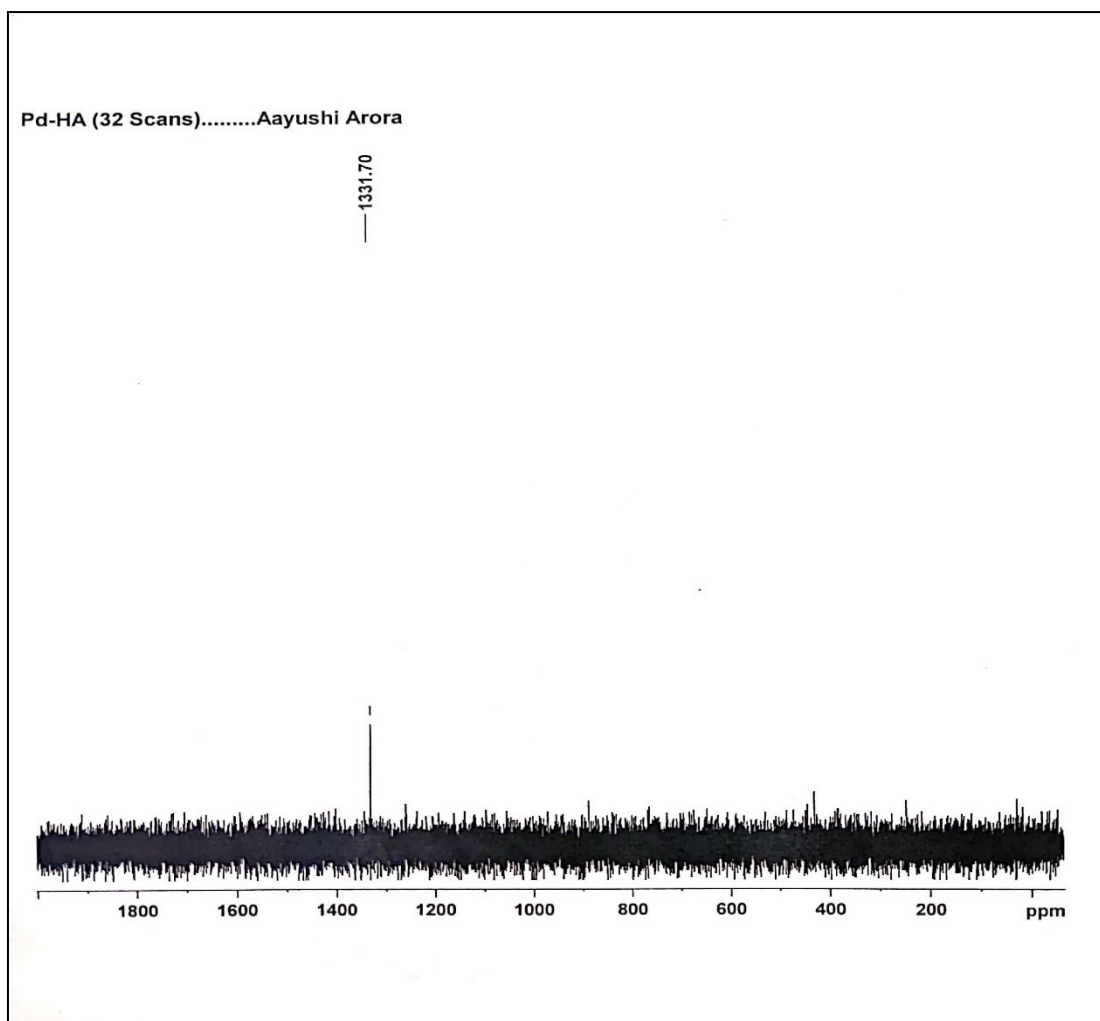

Figure S8.  $^{125}\text{Te}$  NMR of **2**

# Display Report

## Analysis Info

Analysis Name D:\Data\User Data\External Samples\Aayushi\PD-TE.d  
Method Tune\_pos\_Mid.m  
Sample Name Blank  
Comment

Acquisition Date 1/8/2020 12:16:08 PM  
Operator HRMS  
Instrument maXis impact 1819696 00160

## Acquisition Parameter

|             |          |                      |          |                  |           |
|-------------|----------|----------------------|----------|------------------|-----------|
| Source Type | ESI      | Ion Polarity         | Positive | Set Nebulizer    | 0.3 Bar   |
| Focus       | Active   | Set Capillary        | 3500 V   | Set Dry Heater   | 200 °C    |
| Scan Begin  | 50 m/z   | Set End Plate Offset | -500 V   | Set Dry Gas      | 4.0 l/min |
| Scan End    | 3000 m/z | Set Charging Voltage | 2000 V   | Set Divert Valve | Source    |
|             |          | Set Corona           | 0 nA     | Set APCI Heater  | 0 °C      |

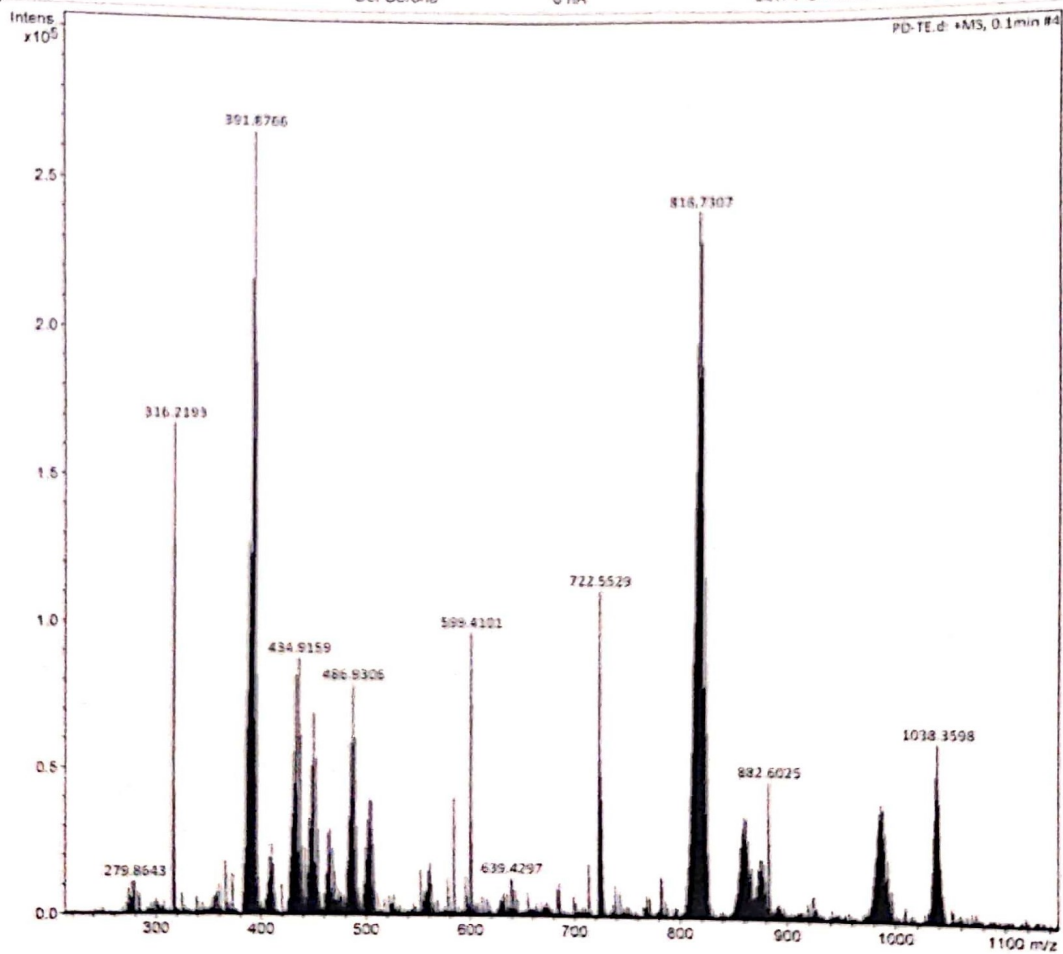

PD-TE.d

Bruker Compass DataAnalysis 4.1

printed: 1/8/2020 4:28:15 PM

by: HRMS

Page 1 of 1

Figure S9. Mass spectra of 1

# Display Report

**Analysis Info**  
Analysis Name D:\Data\User Data\External Samples\Aayushi\PD-HA.d  
Method Tune\_pos\_Mid.m  
Sample Name Blank  
Comment

Acquisition Date 1/8/2020 4:23:54 PM  
Operator HRMS  
Instrument maXis impact 1819696.00160

**Acquisition Parameter**

|             |          |                      |          |                  |           |
|-------------|----------|----------------------|----------|------------------|-----------|
| Source Type | ESI      | Ion Polarity         | Positive | Set Nebulizer    | 0.3 Bar   |
| Focus       | Active   | Set Capillary        | 3500 V   | Set Dry Heater   | 200 °C    |
| Scan Begin  | 50 m/z   | Set End Plate Offset | -500 V   | Set Dry Gas      | 4.0 l/min |
| Scan End    | 3000 m/z | Set Charging Voltage | 2000 V   | Set Divert Valve | Source    |
|             |          | Set Corona           | 0 nA     | Set APCI Heater  | 0 °C      |

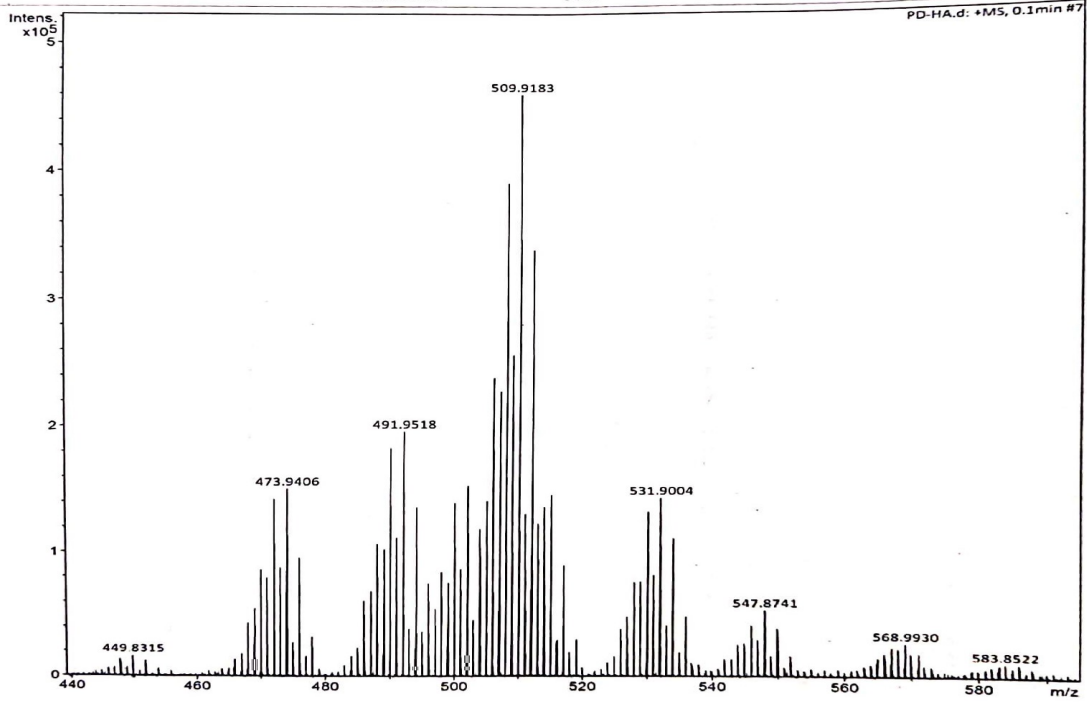

PD-HA.d  
Bruker Compass DataAnalysis 4.1

printed: 1/8/2020 4:26:16 PM

by: HRMS

Page 1 of 1

Figure S10. Mass spectra of 2

## Section 2: Structure Elucidation via Single Crystal X ray Diffraction

The crystal structures of both the palladium complexes depicting the assignment of all atoms are shown below in Figure S11 and S12. The details of all the bond parameters are summarized below in Table S2 and S3.

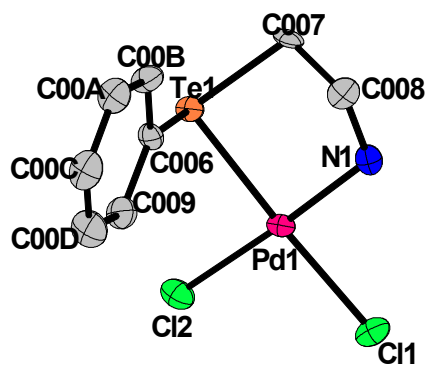

Figure S11. Crystal structure of 1

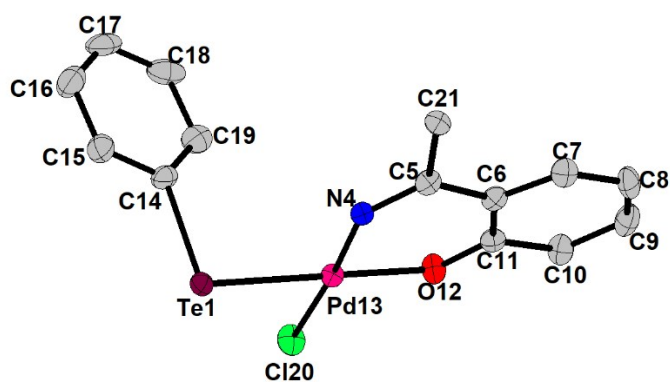

Figure S12. Crystal structure of 2

Table S1. Bond angles and bond lengths of **1**

| Bond Lengths (Å) |            | Bond Angles (°)      |            |
|------------------|------------|----------------------|------------|
| C(006)–C(009)    | 1.399(8)   | C(006)–Te(1)–Pd(1)   | 98.03(15)  |
| C(006)–C(00B)    | 1.388(8)   | C(006)–Te(1)–C(007)  | 94.5(2)    |
| C(007)–C(008)    | 1.505(8)   | C(007)–Te(1)–Pd(1)   | 89.64(15)  |
| C(009)–C(00D)    | 1.403(9)   | Cl(2)–Pd(1)–Te(1)    | 88.82(4)   |
| C(00A)–C(00B)    | 1.390(8)   | Cl(2)–Pd(1)–Cl(1)    | 94.42(6)   |
| C(00A)–C(00C)    | 1.366(9)   | Cl(1)–Pd(1)–Te(1)    | 176.71(4)  |
| C(00C)–C(00D)    | 1.374(9)   | N(1)–Pd(1)–Te(1)     | 88.21(13)  |
| Te(1)–Pd(1)      | 2.5057(6)  | N(1)–Pd(1)–Cl(2)     | 177.02(13) |
| Te(1)–C(006)     | 2.118(6)   | N(1)–Pd(1)–Cl(1)     | 88.54(14)  |
| Te(1)–C(007)     | 2.149(6)   | C(008)–N(1)–Pd(1)    | 116.6(4)   |
| Pd(1)–Cl(2)      | 2.3142(16) | C(009)–C(006)–Te(1)  | 119.4(5)   |
| Pd(1)–Cl(1)      | 2.3710(15) | C(00B)–C(006)–Te(1)  | 121.6(4)   |
| Pd(1)–N(1)       | 2.063(5)   | C(00B)–C(006)–C(009) | 118.8(6)   |
|                  |            | C(008)–C(007)–Te(1)  | 106.9(4)   |
|                  |            | N(1)–C(008)–C(007)   | 112.3(5)   |
|                  |            | C(006)–C(009)–C(00D) | 119.2(6)   |
|                  |            | C(00C)–C(00A)–C(00B) | 120.0(6)   |
|                  |            | C(006)–C(00B)–C(00A) | 121.0(6)   |
|                  |            | C(00A)–C(00C)–C(00D) | 120.2(6)   |
|                  |            | C(00C)–C(00D)–C(009) | 120.7(6)   |

Table S2. Bond angles and bond lengths of **2**

| Bond Lengths (Å) |            | Bond Angles (°)      |            |
|------------------|------------|----------------------|------------|
| Te(1)–Pd(13)     | 2.5002(4)  | C(2)–Te(1)–Pd(13)    | 87.59(12)  |
| Te(1)–C(2)       | 2.120(4)   | C(14)–Te(1)–Pd(13)   | 98.19(13)  |
| Te(1)–C(14)      | 2.123(5)   | C(14)–Te(1)–C(2)     | 95.38(17)  |
| Pd(13)–Cl(20)    | 2.3271(11) | Cl(20)–Pd(13)–Te(1)  | 86.74(3)   |
| Pd(13)–O(12)     | 2.007(3)   | Cl(20)–Pd(13)–Pd(23) | 96.02(3)   |
| Pd(13)–N(4)      | 2.017(4)   | O(12)–Pd(13)–Te(1)   | 175.15(9)  |
| O(12)–C(11)      | 1.306(5)   | O(12)–Pd(13)–Cl(20)  | 88.98(9)   |
| N(4)–C(5)        | 1.319(5)   | N(4)–Pd(13)–Te(1)    | 90.94(10)  |
| N(4)–C(3)        | 1.485(3)   | N(4)–Pd(13)–Cl(20)   | 175.89(11) |
| C(11)–C(6)       | 1.428(6)   | N(4)–Pd(13)–O(12)    | 93.18(13)  |
| C(11)–C(10)      | 1.415(6)   | C(11)–O(12)–Pd(13)   | 125.8(3)   |
| C(5)–C(6)        | 1.473(6)   | C(5)–N(4)–Pd(13)     | 124.4(3)   |
| C(5)–C(21)       | 1.528(6)   | C(3)–N(4)–Pd(13)     | 118.7(3)   |
| C(2)–C(3)        | 1.517(6)   | C(3)–N(4)–C(5)       | 116.2(4)   |
| C(6)–C(7)        | 1.408(6)   | C(6)–C(11)–O(12)     | 125.8(4)   |
| C(14)–C(19)      | 1.380(7)   | C(10)–C(11)–O(12)    | 116.0(4)   |
| C(14)–C(15)      | 1.397(6)   | C(10)–C(11)–C(6)     | 118.2(4)   |
| C(10)–C(9)       | 1.380(7)   | C(6)–C(5)–N(4)       | 125.3(4)   |
| C(7)–C(8)        | 1.367(6)   | C(21)–C(5)–N(4)      | 118.7(4)   |
| C(8)–C(9)        | 1.393(7)   | C(21)–C(5)–C(6)      | 115.9(4)   |
| C(18)–C(17)      | 1.368(8)   | C(2)–C(3)–N(4)       | 113.8(4)   |
| C(17)–C(16)      | 1.366(8)   | C(5)–C(6)–C(11)      | 123.9(4)   |
|                  |            | C(7)–C(6)–C(11)      | 117.2(4)   |
|                  |            | C(7)–C(6)–C(5)       | 118.9(4)   |
|                  |            | C(19)–C(14)–Te(1)    | 122.4(4)   |
|                  |            | C(15)–C(14)–Te(1)    | 117.6(4)   |
|                  |            | C(15)–C(14)–C(19)    | 119.8(5)   |
|                  |            | C(9)–C(10)–C(11)     | 122.4(4)   |
|                  |            | C(9)–C(10)–H(10)     | 118.8(3)   |
|                  |            | C(8)–C(7)–C(6)       | 123.4(4)   |
|                  |            | C(9)–C(8)–C(7)       | 119.6(4)   |
|                  |            | C(8)–C(9)–C(10)      | 119.1(4)   |
|                  |            | C(18)–C(19)–C(14)    | 119.8(5)   |
|                  |            | C(16)–C(15)–C(14)    | 119.4(5)   |
|                  |            | C(17)–C(18)–C(19)    | 119.9(5)   |

### Section 3: X-Ray Photoelectron Spectroscopy

The full binding energy region and Te–3d region are depicted in high resolution XPS spectra (Figure S13 and S14). The different values obtained for binding energy in both the cases are summarised in Table S3. The values for both Pd–3d and Te–3d agree with the previous literature [1,2].

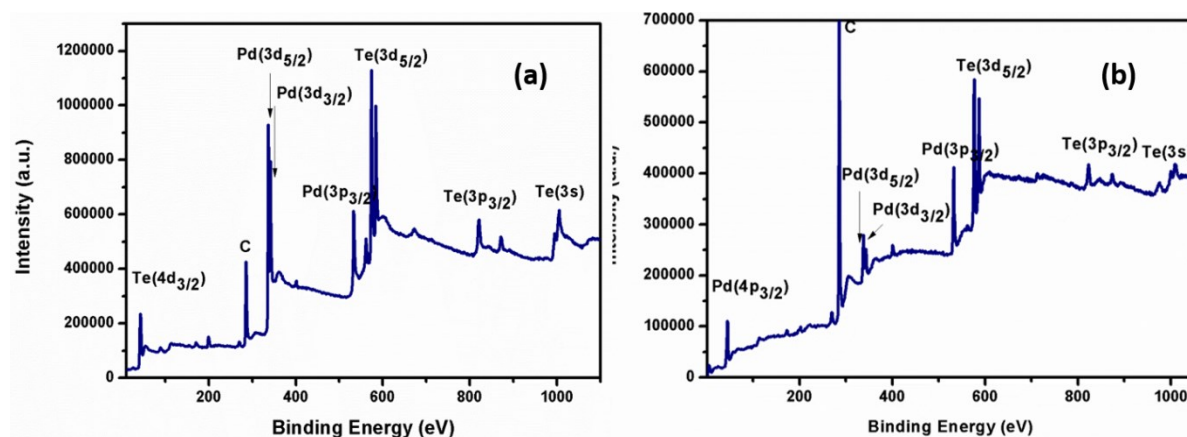

Figure S13. XPS spectra of Pd<sub>9</sub>Te<sub>4</sub> (a) and PdTe (b) nanostructures

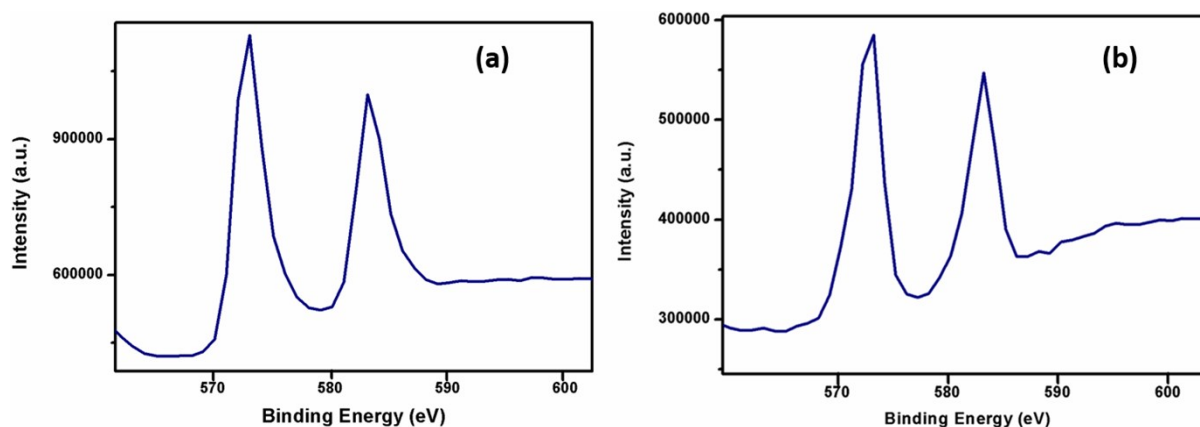

Figure S14. Tellurium 3d spectra of Pd<sub>9</sub>Te<sub>4</sub> (a) and PdTe (b) nanostructures

Table S3. (a) Binding energy values of Pd-3d peak and (b) Te-3d peak in different phases

|     | Material                        | Peak position (lower region) | Peak position (higher region) |
|-----|---------------------------------|------------------------------|-------------------------------|
| (a) | Pd <sub>9</sub> Te <sub>4</sub> | 336.08                       | 341.39                        |
|     |                                 | 337.12                       | 342.08                        |
|     | PdTe                            | 337.80                       | 343.08                        |

|  | Material | Peak position (lower region) | Peak position (higher region) |
|--|----------|------------------------------|-------------------------------|
|  |          |                              |                               |

|     |                                 |        |        |
|-----|---------------------------------|--------|--------|
| (b) | Pd <sub>9</sub> Te <sub>4</sub> | 573.60 | 582.50 |
|     | PdTe                            | 574.29 | 583.10 |

Table S4. Optimization of reaction conditions for Suzuki Miyaura C-C coupling reaction

| Entry No. | Solvent            | Base                            | Yield (%)     |
|-----------|--------------------|---------------------------------|---------------|
| 1         | DMF : Water (4:1)  | Cs <sub>2</sub> CO <sub>3</sub> | 43            |
| 2         | DMF : Water (4:1)  | K <sub>2</sub> CO <sub>3</sub>  | 88            |
| 3         | DMF : Water (4:1)  | CH <sub>3</sub> COONa           | No Conversion |
| 4         | DMF : Water (4:1)  | NaOH                            | No Conversion |
| 5         | DMF                | K <sub>2</sub> CO <sub>3</sub>  | 87            |
| 6         | Toluene            | K <sub>2</sub> CO <sub>3</sub>  | 65            |
| 7         | THF                | K <sub>2</sub> CO <sub>3</sub>  | 15            |
| 8         | EtOH : Water (9:1) | K <sub>2</sub> CO <sub>3</sub>  | 17            |

Reaction Conditions: 4-Chlorobenzaldehyde (1.0 mmol), Phenyl boronic acid (1.1 mmol), base (2.0 mmol), Temp (110 °C), Time 12 h.



## References

- [1] W. Hong, J. Wang and E. Wang, *CrystEngComm*, 2015, **17**, 9011.
- [2] H.-H. Li, S. Zhao, M. Gong, C.-H. Cui, D. He, H.-W. Liang, L. Wu and S.-H. Yu, *Angew. Chem. Intl. Ed.*, 2013, **52**, 7472.
